# Supplementary material for: Entropic Tension in Crowded Membranes
Source: PLoS Comput Biol. 2012 Mar 15;8(3):e1002431. doi: 10.1371/journal.pcbi.1002431 (PMC3305330; doi:10.1371/journal.pcbi.1002431)
Supplement: Text S1 — Additional calculations to justify some assumptions mentioned in the main text. (TEX) [file pcbi.1002431.s001.tex]

% Template for PLoS
% Version 1.0 January 2009
%
% To compile to pdf, run:
% latex plos.template
% bibtex plos.template
% latex plos.template
% latex plos.template
% dvipdf plos.template

\documentclass[10pt]{article}
% amsmath package, useful for mathematical formulas
\usepackage{amsmath}
% amssymb package, useful for mathematical symbols
\usepackage{amssymb}

% graphicx package, useful for including eps and pdf graphics
% include graphics with the command \includegraphics
\usepackage{graphicx}

% cite package, to clean up citations in the main text. Do not remove.
\usepackage{cite}
%\usepackage[numbers,sort&compress]{natbib}

\usepackage{color} 

% Use doublespacing - comment out for single spacing
%\usepackage{setspace} 
%\doublespacing


% Text layout
\topmargin 0.0cm
\oddsidemargin 0.5cm
\evensidemargin 0.5cm
\textwidth 16cm 
\textheight 21cm
% Bold the 'Figure #' in the caption and separate it with a period
% Captions will be left justified
\usepackage[labelfont=bf,labelsep=period,justification=raggedright]{caption}

% Use the PLoS provided bibtex style
\bibliographystyle{plos2009}

% Remove brackets from numbering in List of References
\makeatletter
\renewcommand{\@biblabel}[1]{\quad#1.}
\makeatother
% Leave date blank
\date{}

\pagestyle{myheadings}
%% ** EDIT HERE **


%% ** EDIT HERE **
%% PLEASE INCLUDE ALL MACROS BELOW

% private style files not allowed. Here are the necessary definitions inline 
%\usepackage{graphicx}
%\usepackage{dcolumn}% Align table columns on decimal point
%\usepackage{bm}% bold math
%\usepackage{hyperref}


\newcommand*{\kBT}{k_BT} % kBT
\newcommand*{\Fig}[1]{Figure~\ref{#1}}
\newcommand*{\Eq}[1]{Eq.\ \eqref{#1}}
\newcommand*{\Sec}[1]{Sec.~\ref{#1}}
\newcommand*{\mean}[1]{\langle #1 \rangle} % thermodynamic average
\newcommand*{\Var}{\text{Var}}
\newcommand*{\nm}{\text{nm}}
\newcommand*{\mum}{\mu\text{m}}
% thermodynamic derivatives, holding stuff fixed
\newcommand*{\fix}[1]{\left. #1\right|}%_{stuff to be held constant}
\newcommand*{\fixfrac}[2]{\fix{\frac{#1}{#2}}}
\newcommand*{\fixdiff}[2]{\fix{\frac{\partial #1}{\partial #2}}}

% introduce S before equations, figures, and tables in the SI.
\renewcommand{\theequation}{S.\arabic{equation}}
%\renewcommand{\thesection}{\arabic{section}}
%\renewcommand{\thesubsection}{\arabic{section}.\arabic{subsection}}
%\renewcommand{\thefigure}{\arabic{figure}}
%\renewcommand{\thetable}{\arabic{table}}
\newcommand{\ML}[1]{#1}%\textcolor{red}{#1}}

% cite eqations in the main text, with the prefic M:

%% END MACROS SECTION

\begin{document}
% Title must be 150 characters or less
\begin{flushleft}
{\Large
\textbf{Entropic Tension in Crowded Membranes -- Supporting text S1}
}
% Insert Author names, affiliations and corresponding author email.
\\
Martin Lind\'en$^{1,2}$, 
Pierre Sens$^{3}$, 
Rob Phillips$^{1,3,4,\ast}$
\\
\bf{1} Dept. of Applied Physics, California Institute of Technology, Pasadena, California, U.S.A
\\
\bf{2} Present address: Dept. of Biochemistry and Biophysics, Stockholm University, Stockholm, Sweden
\\
\bf{3} Laboratoire de Physico-Chimie Th{\'e}orique CNRS/UMR 7083 - ESPCI, 75231 Paris Cedex 05, France

\bf{4} Division of Biology, California Institute of Technology, Pasadena, California, U.S.A
\\
$\ast$ E-mail: phillips@pboc.caltech.edu
\end{flushleft}
\section{Neglecting lipid elasticity}\label{SI:squishing}
Our calculations in the constant area ensemble neglected changes in
the elastic energy of the lipid bilayer. Similarly, we approximated
the constant tension ensemble with a constant lipid area, i.e., we
assumed that the strain in the lipids does not change significantly
upon gating. We also neglected thermal fluctuations in lipid area.

In this and the following section, we motivate these assumptions,
by using a simple model of lipid elasticity to argue that these
effects only gives rise to small corrections, so that neglecting them
is a legitimate approximation.  We will use the harmonic model for a
membrane patch with area $A$ and unstretched lipid area $A_0$,
\begin{equation}\label{Lenergy}
  H_\text{lipids}=\frac{\kappa_A}{2}A_0\left(\frac{A-n\pi\mean{R^2}-A_0}{A_0}\right)^2
  =\frac{\kappa_A}{2A_0}(A-A_{\vec{n}})^2,
\end{equation}
where we used the definition $A_{\vec{n}}=A_0+n\pi\mean{R^2}$ in the
last equality. Many lipid bilayers have an area compression modulus
$\kappa_A$ around $\text{0.25 J/m}^2 \sim 60\,\kBT/\nm^2$ (after
correction for bending fluctuations), with cholesterol-rich and
biological membranes being even stiffer \cite{boal}.

%Equations and tables in the main text will be cited by their numbers,
%while all equations etc.~in this supplementary text have numbers
%starting with an S.

If we assume no prestretching of the lipid bilayer, so that
$(A-A_{\vec{n}})\sim \Delta A$, then the change in lipid elastic
energy (\Eq{Lenergy}) is of the order $\Delta H_\text{lipids}\sim
\kappa_A\Delta A^2/2A_0$. With our numerical test parameters
($A_0=A(1-\phi)=A/2\text{, }\Delta A=5\pi\text{ nm}^2\text{,
}\kappa_A\approx 60 \kBT/\nm^2$), and a patch area on the order
$1\;\mu\text{m}^2$, this gives $\Delta H_\text{lipids}\sim 0.02 \kBT$,
which can be safely neglected.
\section{Constant lipid area approximation}\label{SI:constarea}
To motivate the approximation of constant lipid area in the constant
tension ensemble, we use the above lipid elastic model to estimate the
contributions from lipid elasticity and area fluctuations to the
gating energy.  We start with some numerical estimates.

Typical MscL gating tensions are $\sigma_0\sim 0.3-1.3\;\kBT/\nm^2$,
which gives rise to a lipid strain of
$\frac{\sigma_0}{\kappa_A}\approx 0.005-0.02$. The crowding surface
tension with our numerical test parameters ($\phi=0.5$ protein area
fraction, $R_p=1\;\nm$, $c_A=0.16\text{ protein/nm}^2$, and
$\eta^2=0$), is $-\sigma_\text{SPT}=\kBT
c_A/(1-\phi)^2=0.64~\kBT/\nm^2$, which induces a strain of magnitude
$10^{-2}$, comparable the gating strain.

The crowding tension changes with total area, in a way that can be
characterized by an entropic compression modulus,
\begin{equation}\label{kSPT1}  
  \kappa_\text{SPT}=-A_0\kBT\frac{\partial^2\ln Z}{\partial A^2}
  =A_0\frac{\partial\sigma_\text{SPT}}{\partial A}.
\end{equation}
Differentiating the expression for $\sigma_\text{SPT}$,
Eq.~(8)in the main text, we get
\begin{equation}\label{kSPT2}      
      \kappa_\text{SPT}
      =\frac{nA_0\kBT}{\big(A-n\pi\mean{R^2}\big)^{2}}
      +\frac{2A_0\kBT n^2\pi\mean{R}^2}{\big(A-n\pi\mean{R^2}\big)^{3}}.
\end{equation}
In this expression, $A_0$ is truly a constant (by definition of the
compression modulus), but since we expect the lipid strain to be
small, we can get a numerical estimate by using $A_0\approx
A-n\pi\mean{R^2}=A(1-\phi)$, which allows us to simplify in the usual
way, and write
\begin{equation}\label{kSPT3}
   \kappa_\text{SPT}\approx
   \frac{c_A\kBT}{(1-\phi)}\Big(1+\frac{c_A2\pi\mean{R}^2}{1-\phi}\Big).
\end{equation}
With our numerical test parameters and $\kappa_A=60 ~\kBT/\nm^2$, we
get $\kappa_\text{SPT}/\kappa_A\approx 0.016$, so the entropic
compression modulus is insignificant compared to the lipid stiffness.

In light of the above tension estimates, an estimated upper bound on
the lipid strain near MscL gating conditions is therefore
    \begin{equation}
      \frac{\sigma_0-\sigma_\text{SPT}}{\kappa_A+\kappa_\text{SPT}}
      \lesssim \frac{2\sigma_0}{\kappa_A}\sim 0.03.
    \end{equation}
This is not quite as small as $\pi R^2/A$, but still small enough that
we can safely neglect terms of that magnitude.
 
Next, we assess the importance of lipid area changes and fluctuations
by computing the partition function $\Xi$ using a saddle-point
approximation, i.e., expand fluctuations to second order, and show
that we recover the results of the main text, plus small correction
terms.

The above estimates strongly suggest that only areas close to
$A_{\vec{n}}$ will contribute significantly to the constant tension
partition function $\Xi$ (see Eq.~(21) in the main text), and we
therefore expand the canonical partition function $Z$ to second order
around that point. We get
\begin{equation}
  \ln Z(A,\vec{n},T)=
  \ln Z(A_{\vec{n}},\vec{n},T)  
  +\Big.\frac{\partial\ln Z}{\partial A}\Big|_{A_{\vec{n}}}(A-A_{\vec{n}})
  +\frac{1}{2}\frac{\partial^2\ln Z}{\partial A^2}\Big|_{A_{\vec{n}}}
  (A-A_{\vec{n}})^2+\ldots.
\end{equation} 
Upon substituting \Eq{kSPT1} and Eq.~(7) in the main text, we can
write this in the form
\begin{equation}
  \ln Z(A,\vec{n},T)\approx
  \ln Z(A_{\vec{n}},\vec{n},T)-\beta\sigma_\text{SPT}(A-A_{\vec{n}})\\
  -\frac{\beta\kappa_\text{SPT}}{2A_0}(A-A_{\vec{n}})^2,
\end{equation}
where it is understood that $\sigma_\text{SPT}$ and
$\kappa_\text{SPT}$ are evaluated at $A=A_{\vec{n}}$.  Inserting the
simple lipid energy and the above expansion in the partition function
$\Xi$ (main text Eq.~(21)), we get
  \begin{align}
  \Xi(\sigma,\vec{n},T)=&\int dA\;Z(A,\vec{n},T) 
  \exp\left(\beta\sigma A-\frac{\beta\kappa_A}{2A_0}(A-A_{\vec{n}})^2\right)\\
  \label{Xigauss}
  \approx&
  Z(A_{\vec{n}},\vec{n},T)e^{\beta\sigma A_{\vec{n}}}
  \int dA\; \exp\left(\beta(\sigma-\sigma_\text{SPT})(A-A_{\vec{n}})
  -\frac{\beta(\kappa_A+\kappa_\text{SPT})}{2A_0}(A-A_{\vec{n}})^2\right).
  \end{align}
The function in the exponent takes a maximum at
$A^*_{\vec{n}}=A_{\vec{n}}+A_0\fix{\frac{\sigma-\sigma_\text{SPT}}{\kappa_A+\kappa_\text{SPT}}}_{A_{\vec{n}}}$,
which is indeed very close to $A_{\vec{n}}$, since $A_0<A_{\vec{n}}$,
and $\frac{\sigma-\sigma_\text{SPT}}{\kappa_A+\kappa_\text{SPT}}\ll
1$. We can now evaluate $\Xi$ approximately, since \Eq{Xigauss} is a
Gaussian integral, and get the saddle point approximation
\begin{align}
  \Xi(\sigma,\vec{n},T)\approx&
  Z(A_{\vec{n}},\vec{n},T)e^{\beta\sigma A_{\vec{n}}}
  \exp\left(\frac{\beta A_0}{2}
  \frac{(\sigma-\sigma_\text{SPT})^2}{\kappa_A+\kappa_\text{SPT}}
\right)\fix{\sqrt{\frac{2\pi\kBT A_0}{\kappa_A+\kappa_\text{SPT}}}}_{A_{\vec{n}}}.
\end{align}
After discarding irrelevant constants, we recover the free energy of
Eq.~(23) in the main text, with two correction terms that we denote
$G_1$ and $G_2$,
\begin{equation}\label{XiExpansion2}
  \underbrace{G(\sigma,\vec{n},T)\approx -\kBT\ln
    Z(A_{\vec{n}},\vec{n},T) -\sigma A_{\vec{n}}}_{\text{Eq.~(23)}} 
  \underbrace{-\frac{A_0}{2}
    \frac{(\sigma-\sigma_\text{SPT})^2}{\kappa_A+\kappa_\text{SPT}}
  }_{=G_1(A_{\vec{n}},\vec{n},T)}
  +
  \underbrace{
    \frac{\kBT}{2}\ln\big(1+\frac{\kappa_\text{SPT}}{\kappa_A}\big)
    }_{=G_2(A_{\vec{n}},\vec{n},T)},
\end{equation}  
with all terms evaluated at area $A_{\vec{n}}$.  What we need to show,
is that the correction terms $G_1$ and $G_2$ indeed produce only small
contributions to the overall gating tension.

We start with $G_2$. Since $\frac{\kappa_\text{SPT}}{\kappa_A}\ll 1$,
we can Taylor expand the logarithm, and obtain $G_2\approx
\kBT\kappa_\text{SPT}/2\kappa_A$. But for the same reason, we see that
$G_2$ is already a small quantity, and therefore cannot make a
significant contribution to the gating free energy.

For $G_1$, a little more effort is needed. We start by noting that we
can ignore the entropic compression modulus, since it only contributes
a factor $\frac{\kappa_A}{\kappa_\text{SPT}+\kappa_A}\approx
(1-\frac{\kappa_\text{SPT}}{\kappa_A}+\ldots)$, i.e., a small
correction to $\Delta G_1$.  Next, we rewrite $\sigma_\text{SPT}$ from
Eq~(8) in the main text, substitute $\Var(R)=\mean{R^2}-\mean{R}^2$,
and use the fact that $A-n\pi{R^2}=A_0$ when $A=A_{\vec{n}}$. This
leads to
\begin{equation}\label{sigmaG1}
  \frac{\sigma_\text{SPT}}{\kBT}
  =-n\frac{A_0+n\pi\mean{R}^2}{A_0^2}=
  -\frac{n}{A_0}-\Big(\frac{n}{A_0}\Big)^2\pi\mean{R}^2.
\end{equation}

We now consider the gating energy contribution, for the case of $N$
crowders and a single channel that changes radius from $R_c$ to
$R_o$. Using the definition of $G_1$ in \Eq{XiExpansion2}, we get
\begin{equation}
  \Delta G_1=-\frac{A_0}{2\kappa_A}\Big(
  \big(\sigma-\sigma_\text{SPT}(\vec{N}+\hat{e}_o)\big)^2
  -\big(\sigma-\sigma_\text{SPT}(\vec{N}+\hat{e}_c)\big)^2\Big),
\end{equation}
where we have written out the copy number distribution arguments of
the tensions. This can be rewritten as
\begin{equation}
    \Delta G_1=-\frac{A_0}{\kappa_A}\bigg(\sigma
  -\frac{\sigma_\text{SPT}(\vec{N}+\hat{e}_o)
        +\sigma_\text{SPT}(\vec{N}+\hat{e}_c)}{2}
  \bigg) \times\Big(
  \sigma_\text{SPT}(\vec{N}+\hat{e}_c)
 -\sigma_\text{SPT}(\vec{N}+\hat{e}_o)\Big).
\end{equation}
For order of magnitude estimates, approximating
$\frac{1}{2}\big(\sigma_\text{SPT}(\vec{N}+\hat{e}_o)
+\sigma_\text{SPT}(\vec{N}+\hat{e}_c)\big)\approx \sigma_\text{SPT}$
(with unspecified channel conformation) is good enough. The difference
in the last factor must be treated with more care. Substituting
\Eq{sigmaG1} with $n=N+1$ and
$\mean{R}=\frac{N\mean{R_p}+R_{o,c}}{N+1}$ for the mean protein radius
in the two states ($\mean{R_p}$ is the mean radius of the crowders
only), we get
\begin{equation}
  \frac{\Delta G_1}{\kBT}
  =-A_0\frac{\sigma-\sigma_\text{SPT}}{\kappa_A}
    \times\Big(\frac{N+1}{A_0}\Big)^2
\Big(\frac{(N\mean{R_p}+R_o)^2-(N\mean{R_p}+R_c)^2}{(N+1)^2}\Big).
\end{equation}
Expanding the squares in the last factor, substituting
$\frac{N}{A_0}=\frac{c_A}{1-\phi}$, and neglecting a term of order
$\pi R^2/A_0$, we finally get
\begin{equation}
  \frac{\Delta G_1}{\kBT}
  =-\Big(\frac{\sigma-\sigma_\text{SPT}}{\kappa_A}\Big)
  \frac{c_A\mean{R_p}\Delta C}{1-\phi}.
\end{equation}
This is a negative correction to the familiar line tension. For gating
of MscL ($\sigma\approx \sigma_0$), it is smaller than the lowest
order term\ML{, Eq.~(27) in the main text,} by a factor
$\frac{\sigma_0-\sigma_\text{SPT}}{\kappa_A}\lesssim 10^{-2}$, indeed
a small correction.


\bibliography{references.bib}
\end{document}
